# Supplementary material
Source: MDPI journal article supplement (https://www.mdpi.com/2412-382X/7/2/13)
Supplement: s1 [file s1]

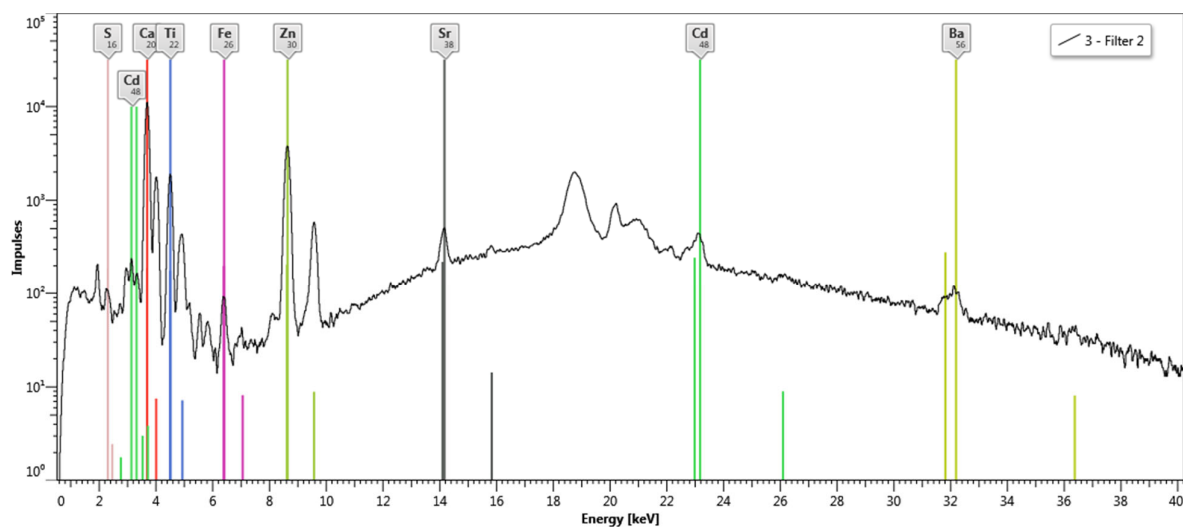

**Figure S1.** XRF spectrum of measuring points 3 (yellow). The characteristic lines of all elements detected were highlighted, rhodium and argon were excluded.

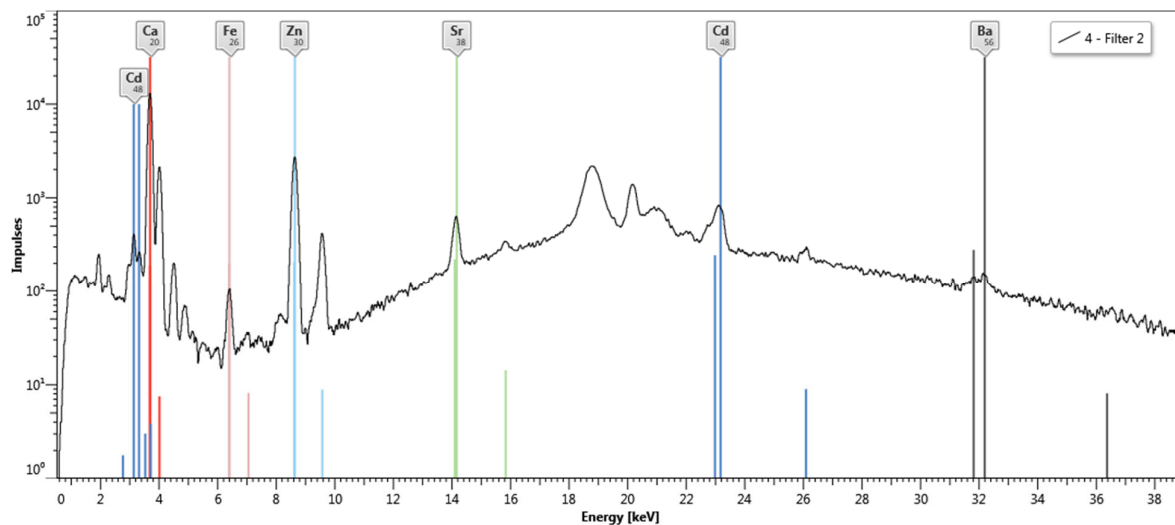

**Figure S2.** XRF spectrum of measuring points 4 (yellow). The characteristic lines of all elements detected were highlighted, rhodium and argon were excluded.

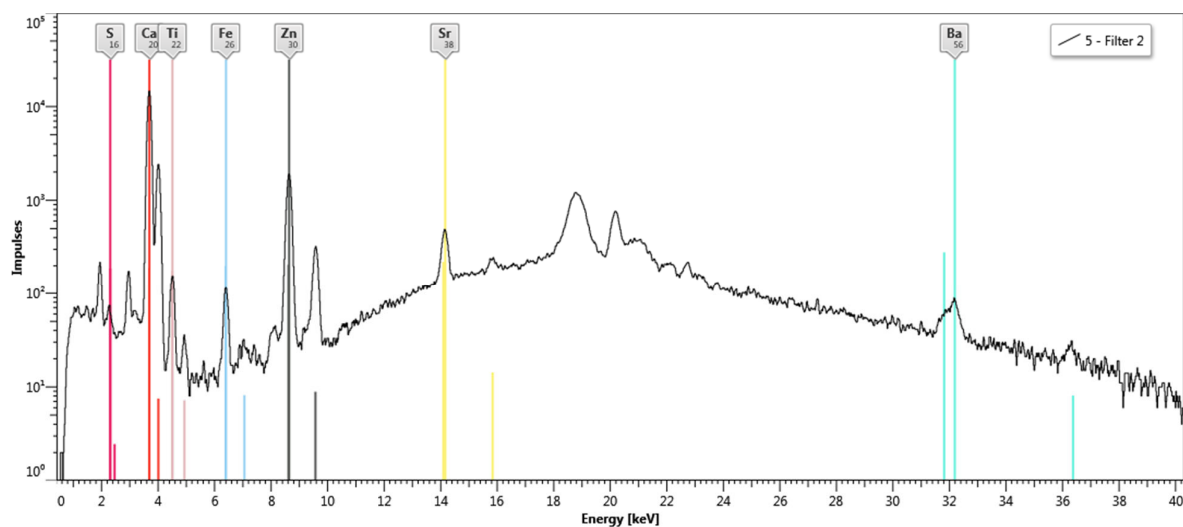

**Figure S3.** XRF spectrum of measuring points 5 (yellow). The characteristic lines of all elements detected were highlighted, rhodium and argon were excluded.

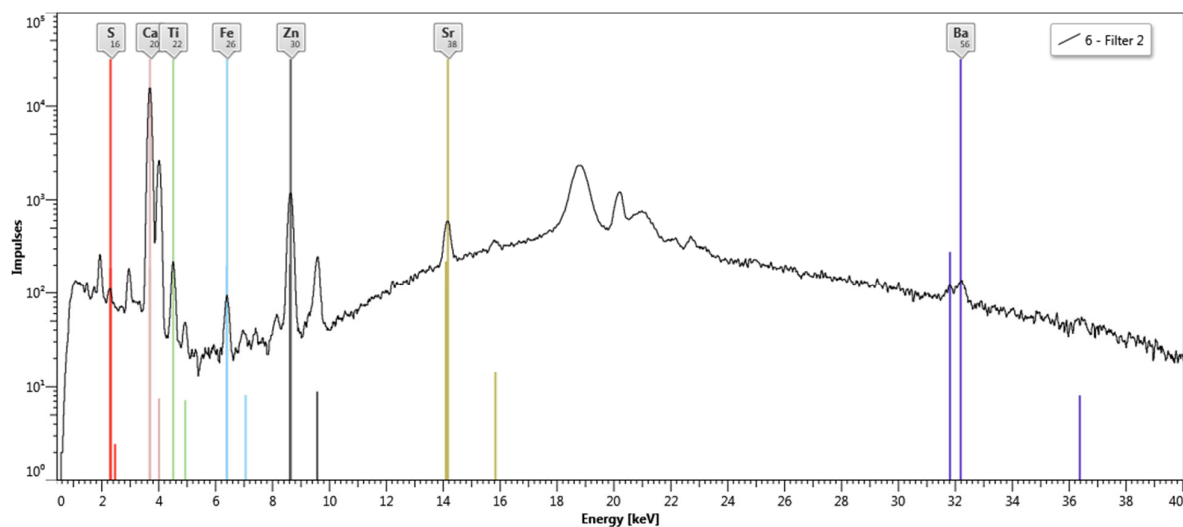

**Figure S4.** XRF spectrum of measuring points 6 (yellow). The characteristic lines of all elements detected were highlighted, rhodium and argon were excluded.

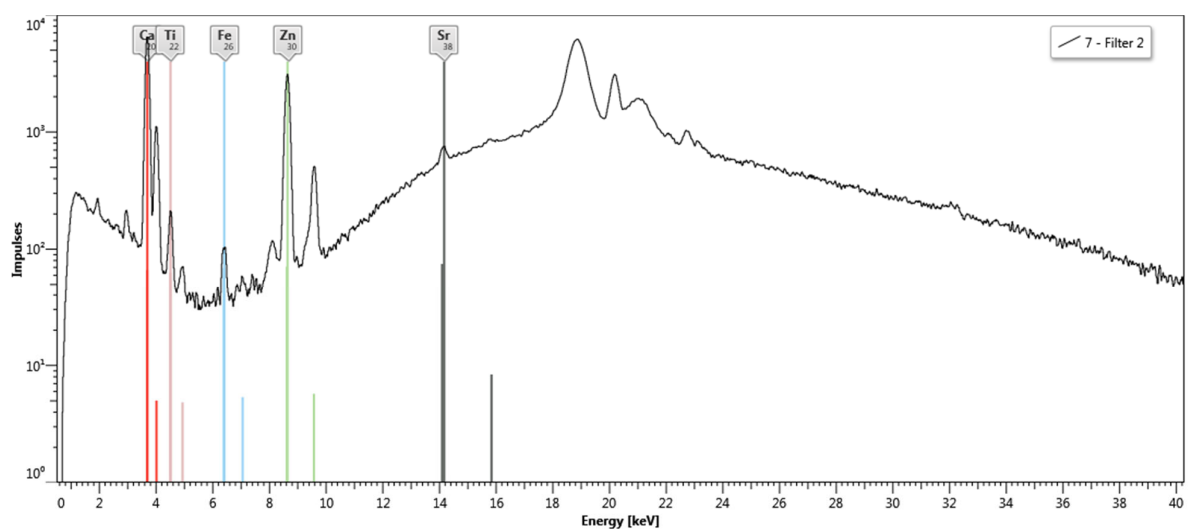

**Figure S5.** XRF spectrum of measuring points 7 (green). The characteristic lines of all elements detected were highlighted, rhodium and argon were excluded.

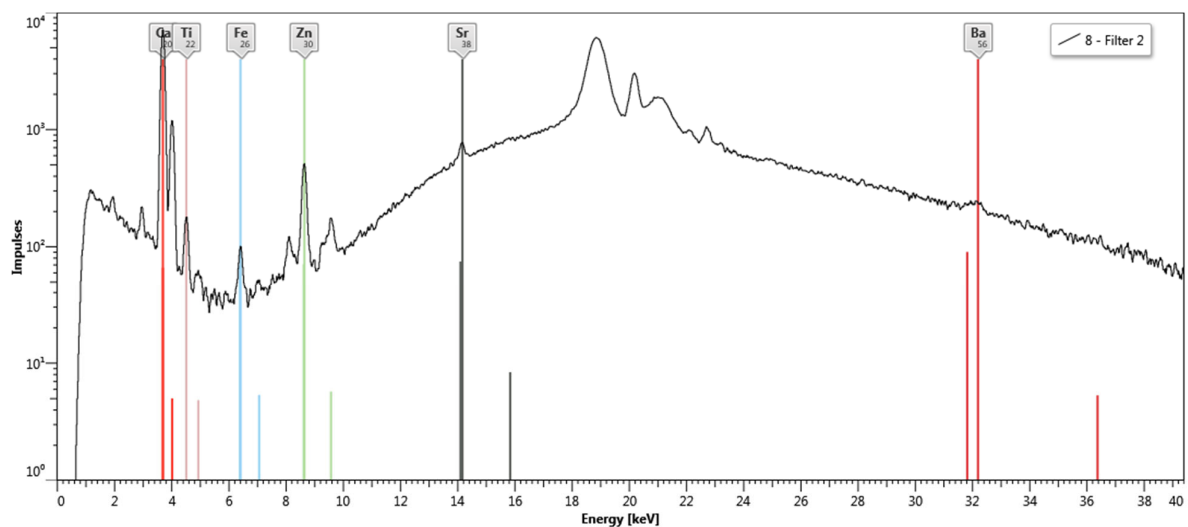

**Figure S6.** XRF spectrum of measuring points 8 (yellow). The characteristic lines of all elements detected were highlighted, rhodium and argon were excluded.

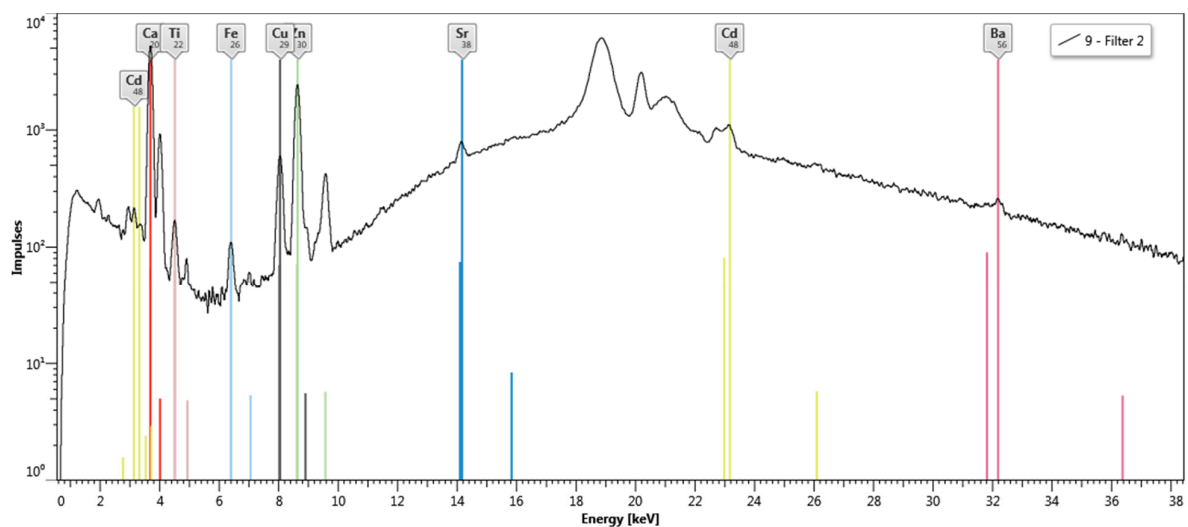

**Figure S7.** XRF spectrum of measuring points 9 (yellow). The characteristic lines of all elements detected were highlighted, rhodium and argon were excluded.

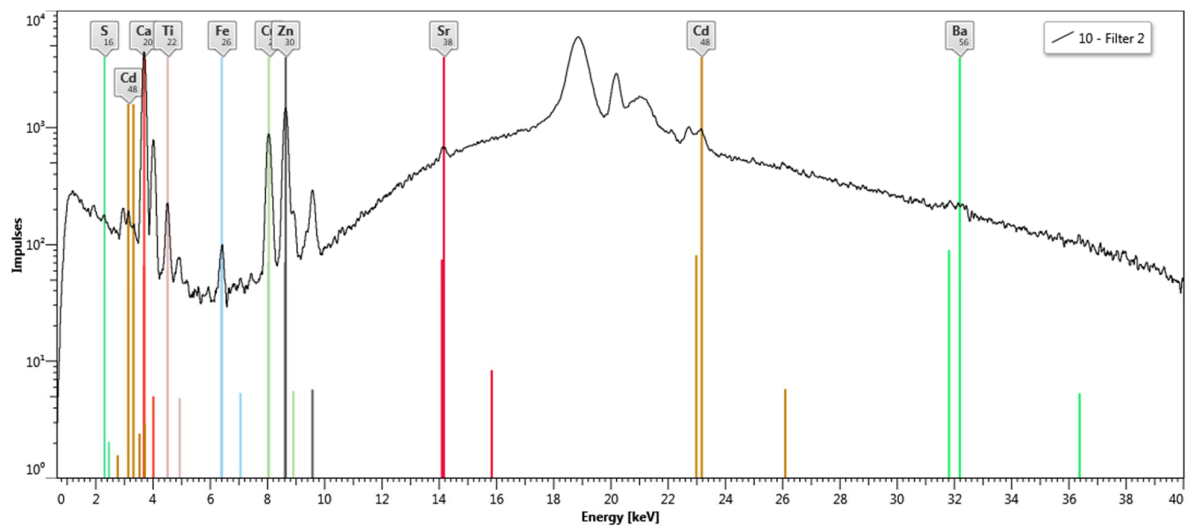

**Figure S8.** XRF spectrum of measuring points 10 (green/yellow). The characteristic lines of all elements detected were highlighted, rhodium and argon were excluded.

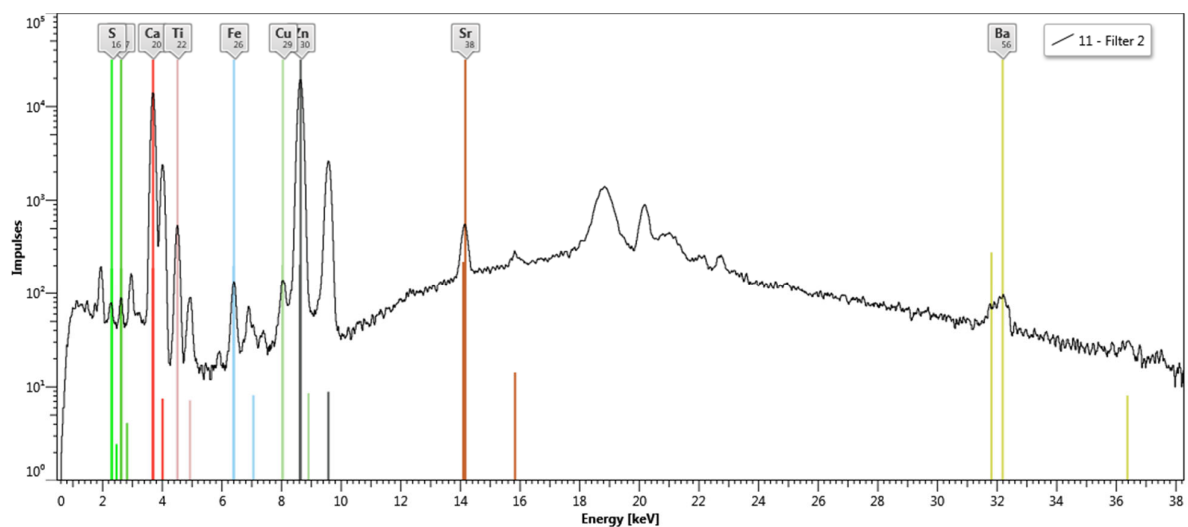

**Figure S9.** XRF spectrum of measuring points 11 (green). The characteristic lines of all elements detected were highlighted, rhodium and argon were excluded.

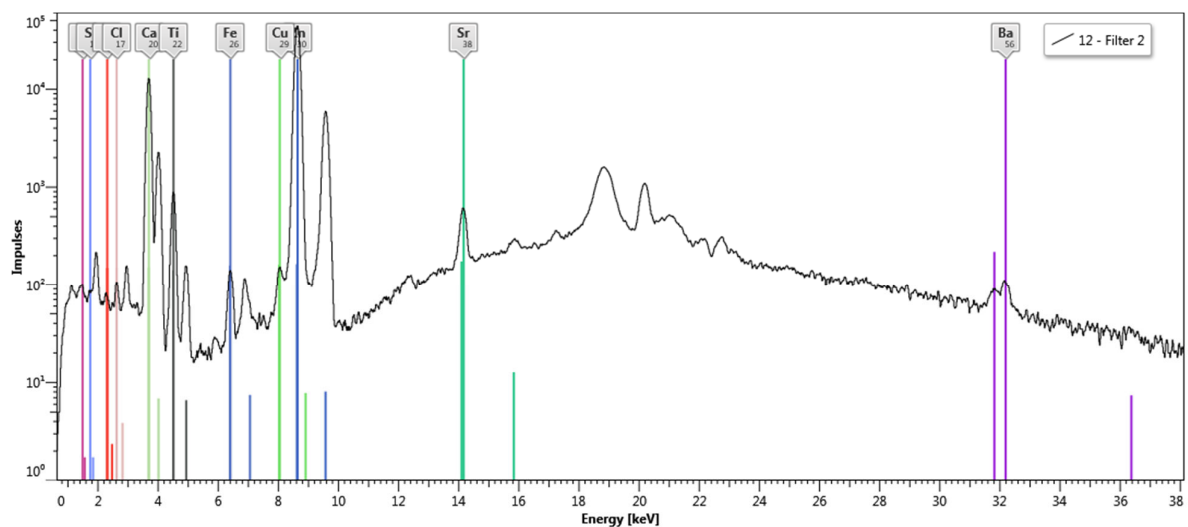

**Figure S10.** XRF spectrum of measuring points 12 (green). The characteristic lines of all elements detected were highlighted, rhodium and argon were excluded.

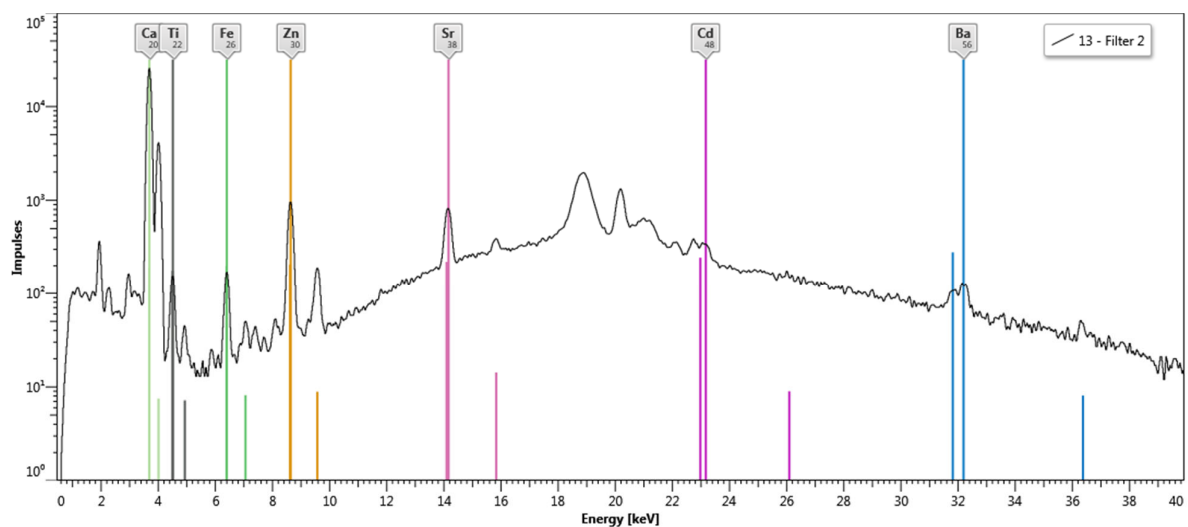

**Figure S11.** XRF spectrum of measuring points 13 (orange). The characteristic lines of all elements detected were highlighted, rhodium and argon were excluded.

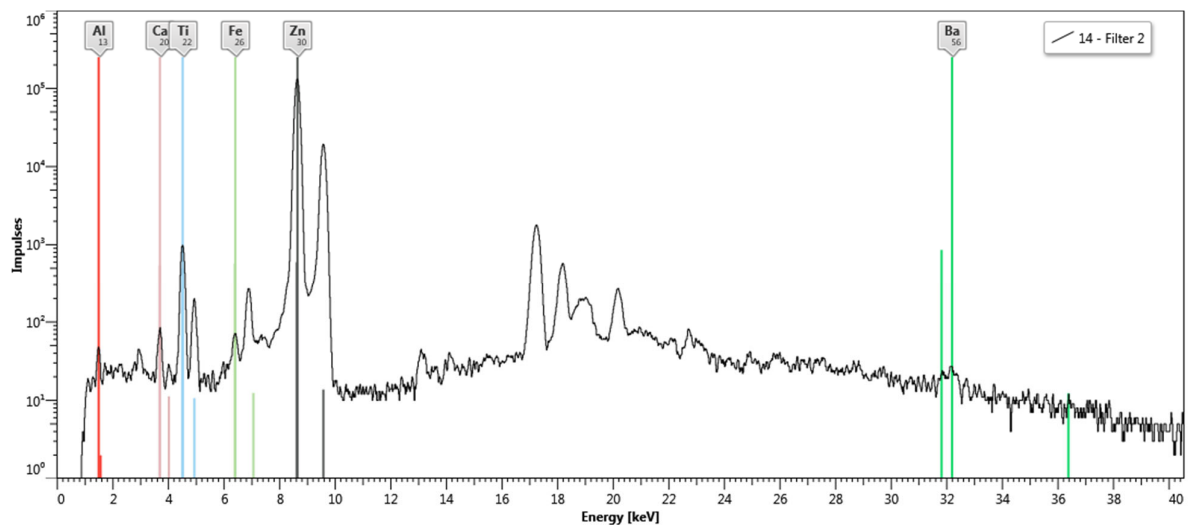

**Figure S12.** XRF spectrum of measuring points 14 (white). The characteristic lines of all elements detected were highlighted, rhodium and argon were excluded.

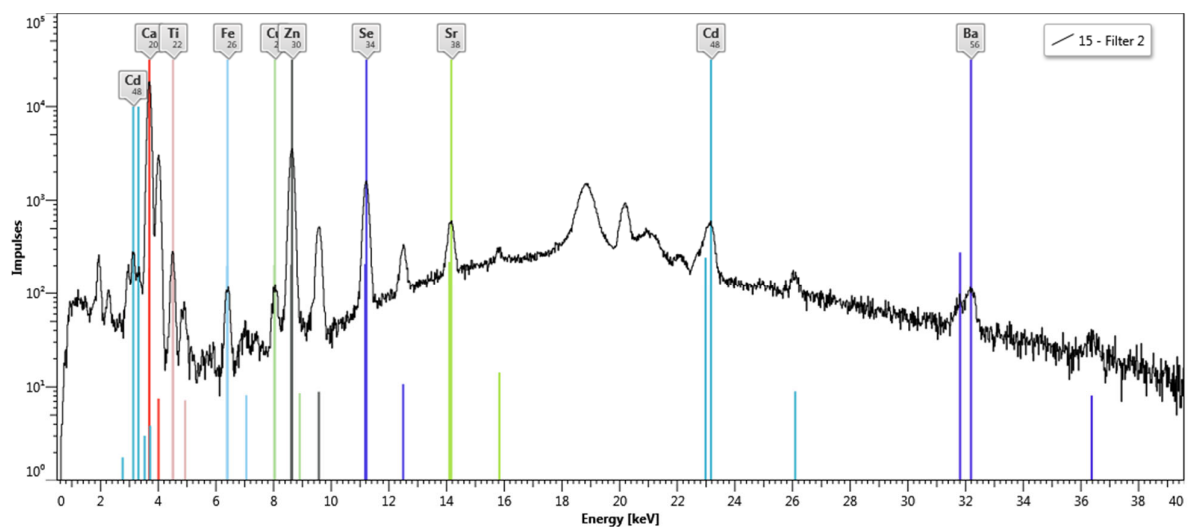

**Figure S13.** XRF spectrum of measuring points 15 (red). The characteristic lines of all elements detected were highlighted, rhodium and argon were excluded.

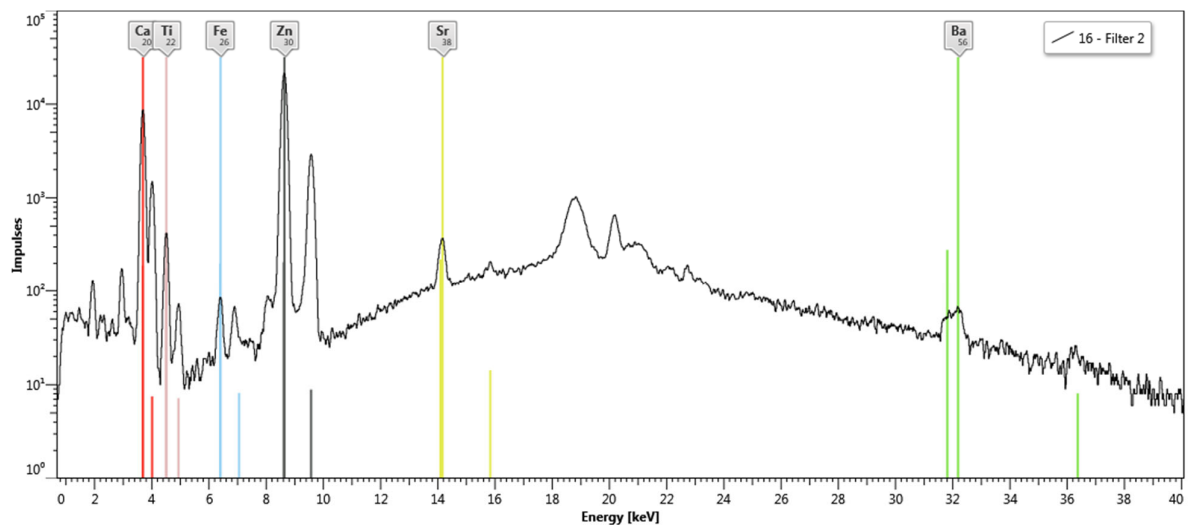

**Figure S14.** XRF spectrum of measuring points 16 (green). The characteristic lines of all elements detected were highlighted, rhodium and argon were excluded.

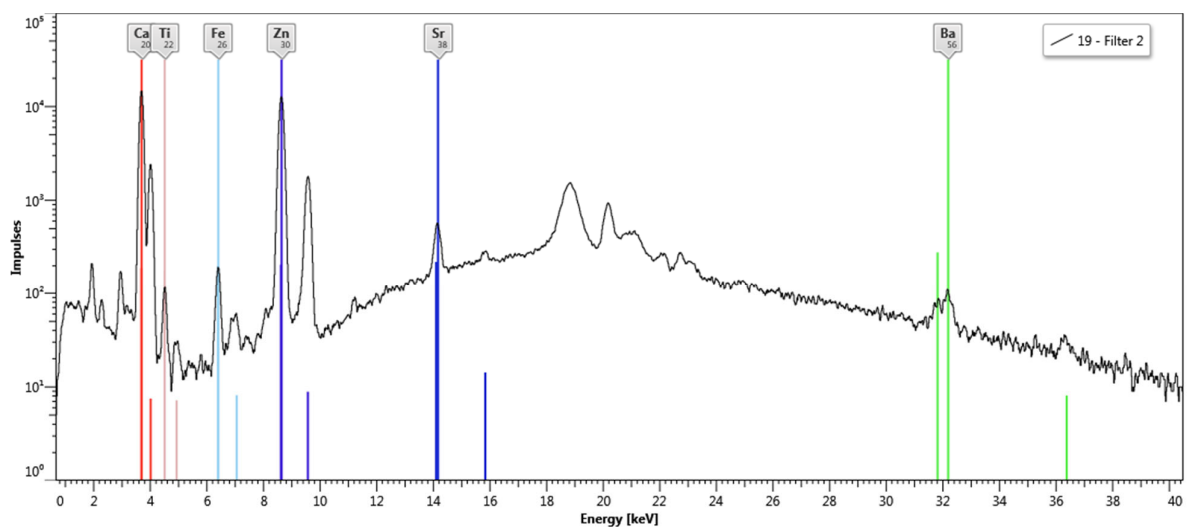

**Figure S15.** XRF spectrum of measuring points 19 (orange). The characteristic lines of all elements detected were highlighted, rhodium and argon were excluded.

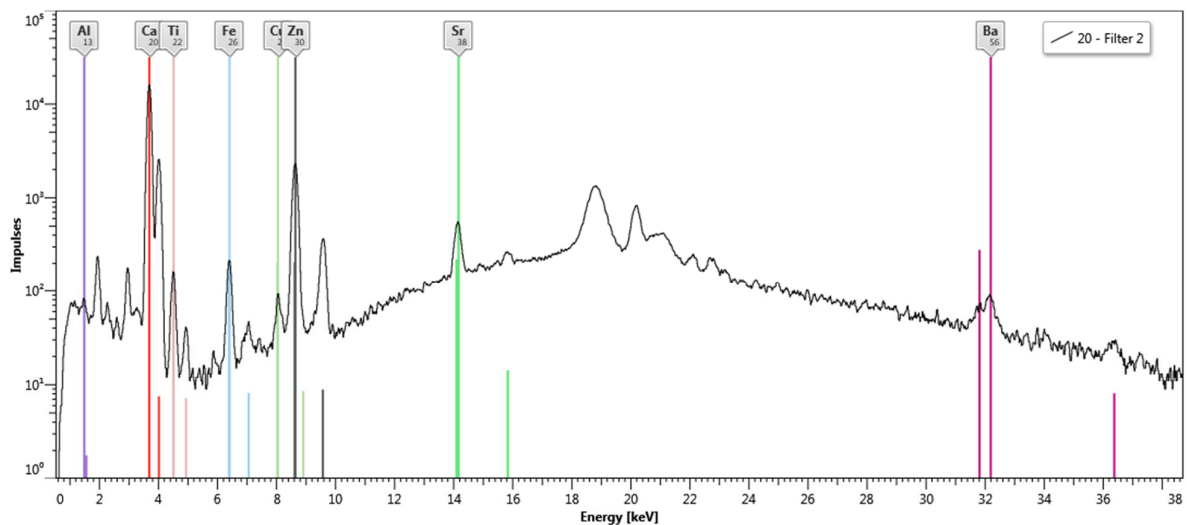

**Figure S16.** XRF spectrum of measuring points 20 (black). The characteristic lines of all elements detected were highlighted, rhodium and argon were excluded.



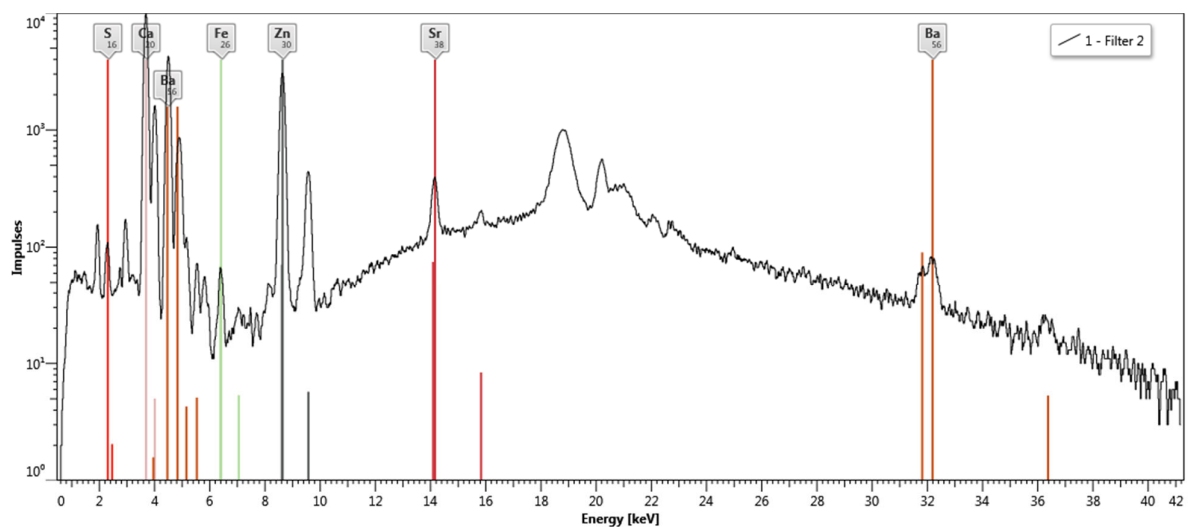

**Figure S17.** XRF spectrum of measuring points 1. The characteristic lines of all elements detected were highlighted, rhodium and argon were excluded.

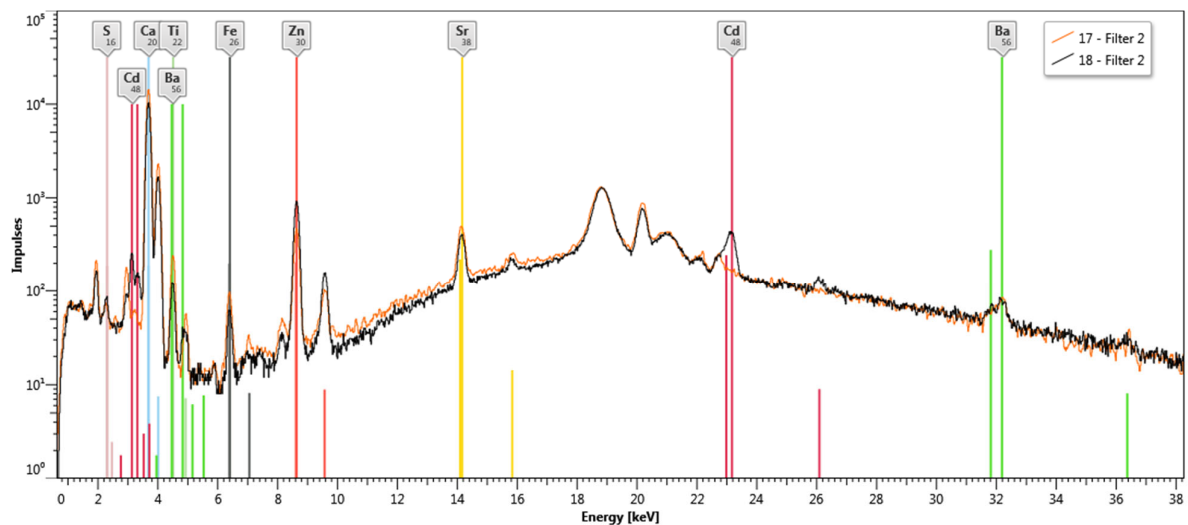

**Figure S18.** XRF spectra of measuring points 17 (orange spectrum) and 18 (black spectrum). The characteristic lines of all elements detected were highlighted, rhodium and argon were excluded.

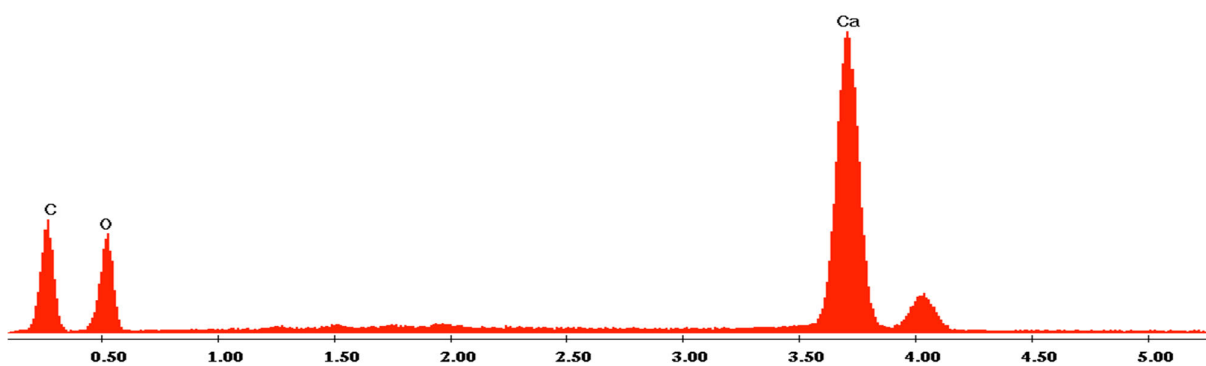

**Figure S19.** SEM/EDS spectra of white area of sample 3. The characteristic lines of all elements detected were highlighted.

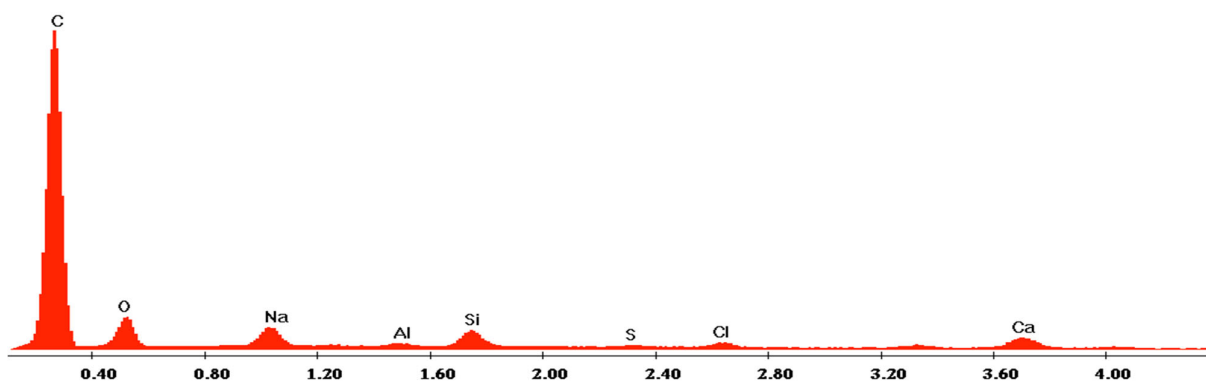

**Figure S20.** SEM/EDS spectra of dark yellow (B) area of sample 3. The characteristic lines of all elements detected were highlighted.

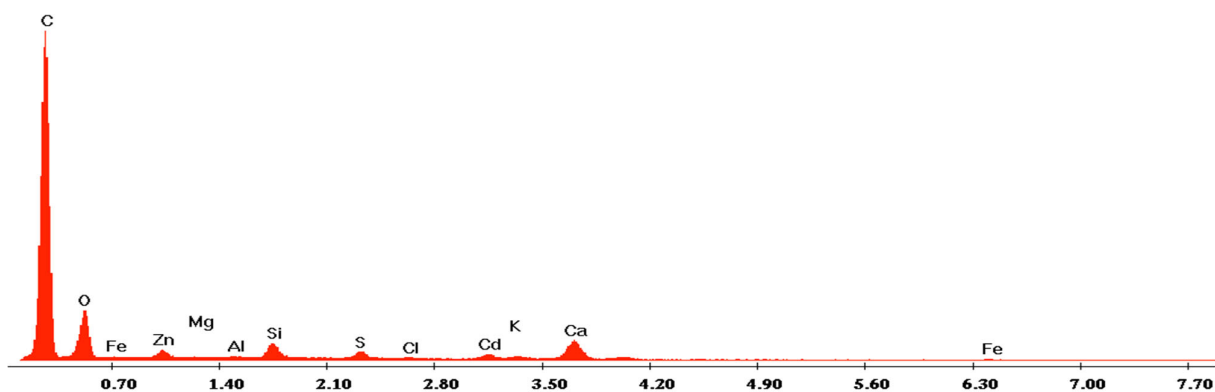

**Figure S21.** SEM/EDS spectra of yellow area (A) of sample 3. The characteristic lines of all elements detected were highlighted.

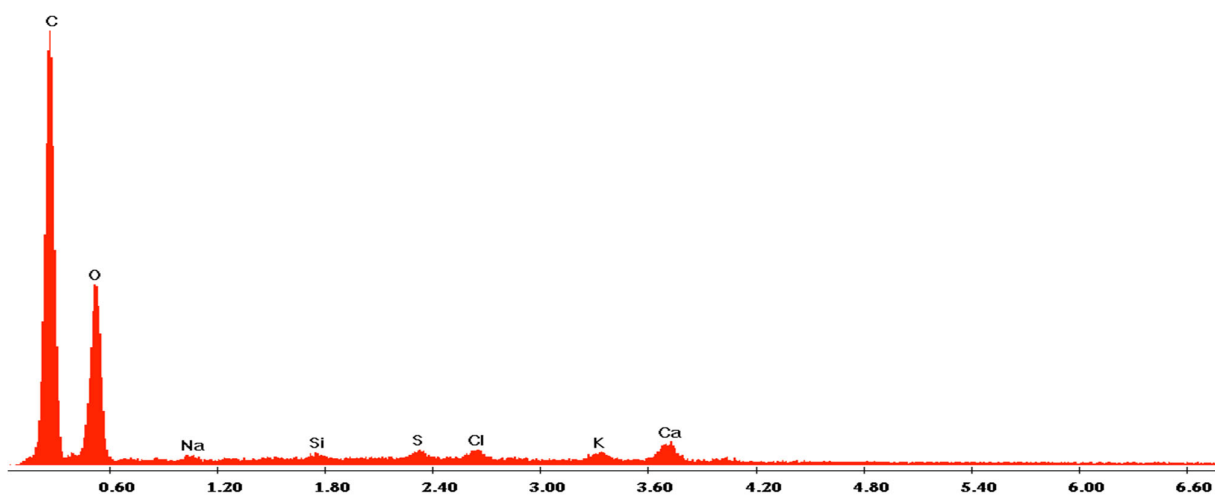

**Figure S22.** SEM/EDS spectra of tissue-sample 1. The characteristic lines of all elements detected were highlighted.

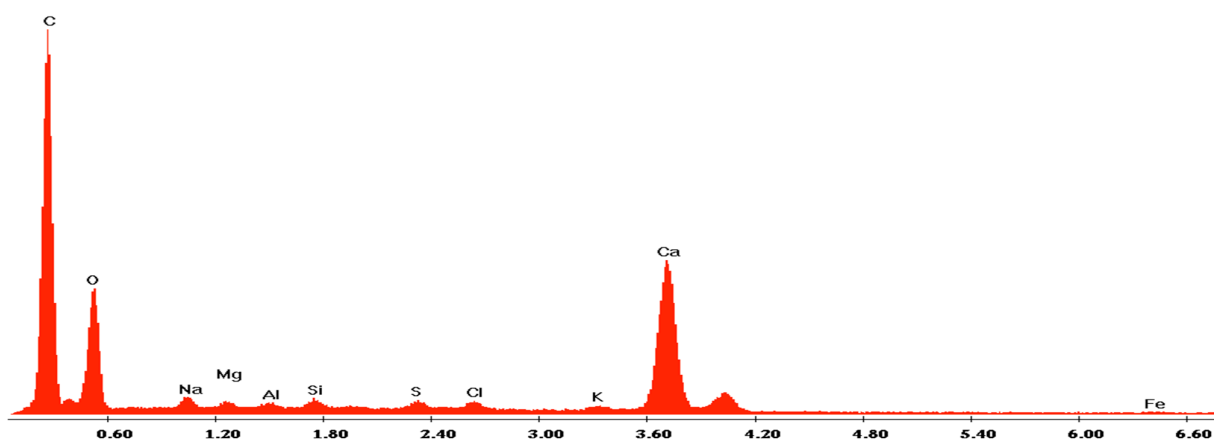

**Figure S23.** SEM/EDS spectra of white area-sample 1. The characteristic lines of all elements detected were highlighted.

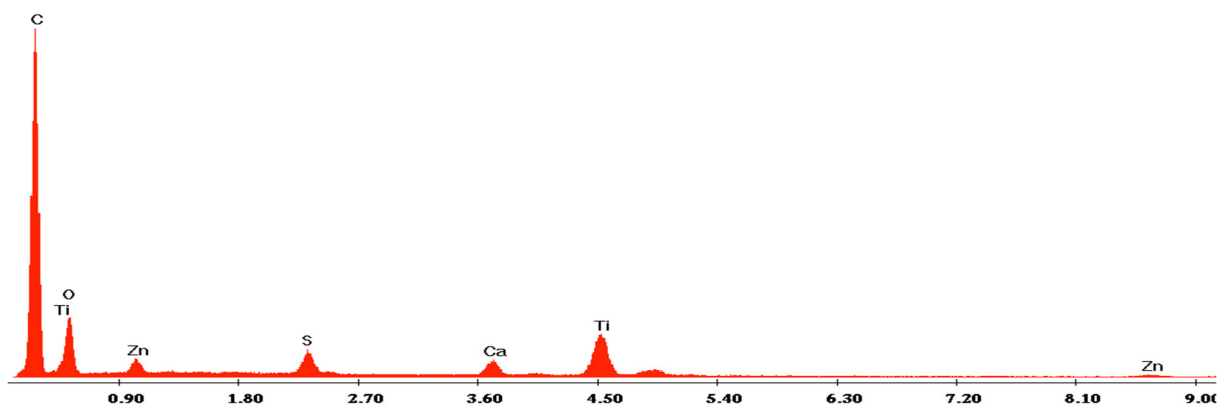

**Figure S24.** SEM/EDS spectra of point2-sample 2. The characteristic lines of all elements detected were highlighted.

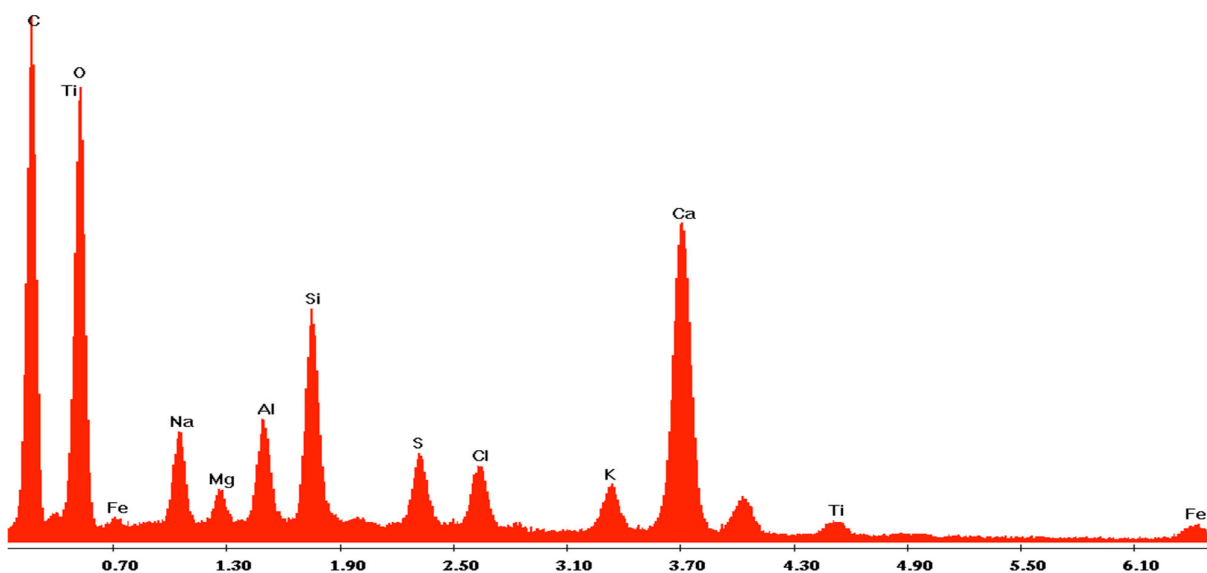

**Figure S25.** SEM/EDS spectra of point3-sample 2. The characteristic lines of all elements detected were highlighted.
